# Supplementary material for: Whole-Organ Isolation Approach as a Basis for Tissue-Specific Analyses in Schistosoma mansoni
Source: PLOS journal article supplement (doi:10.1371/journal.pntd.0002336), 2013-07-25

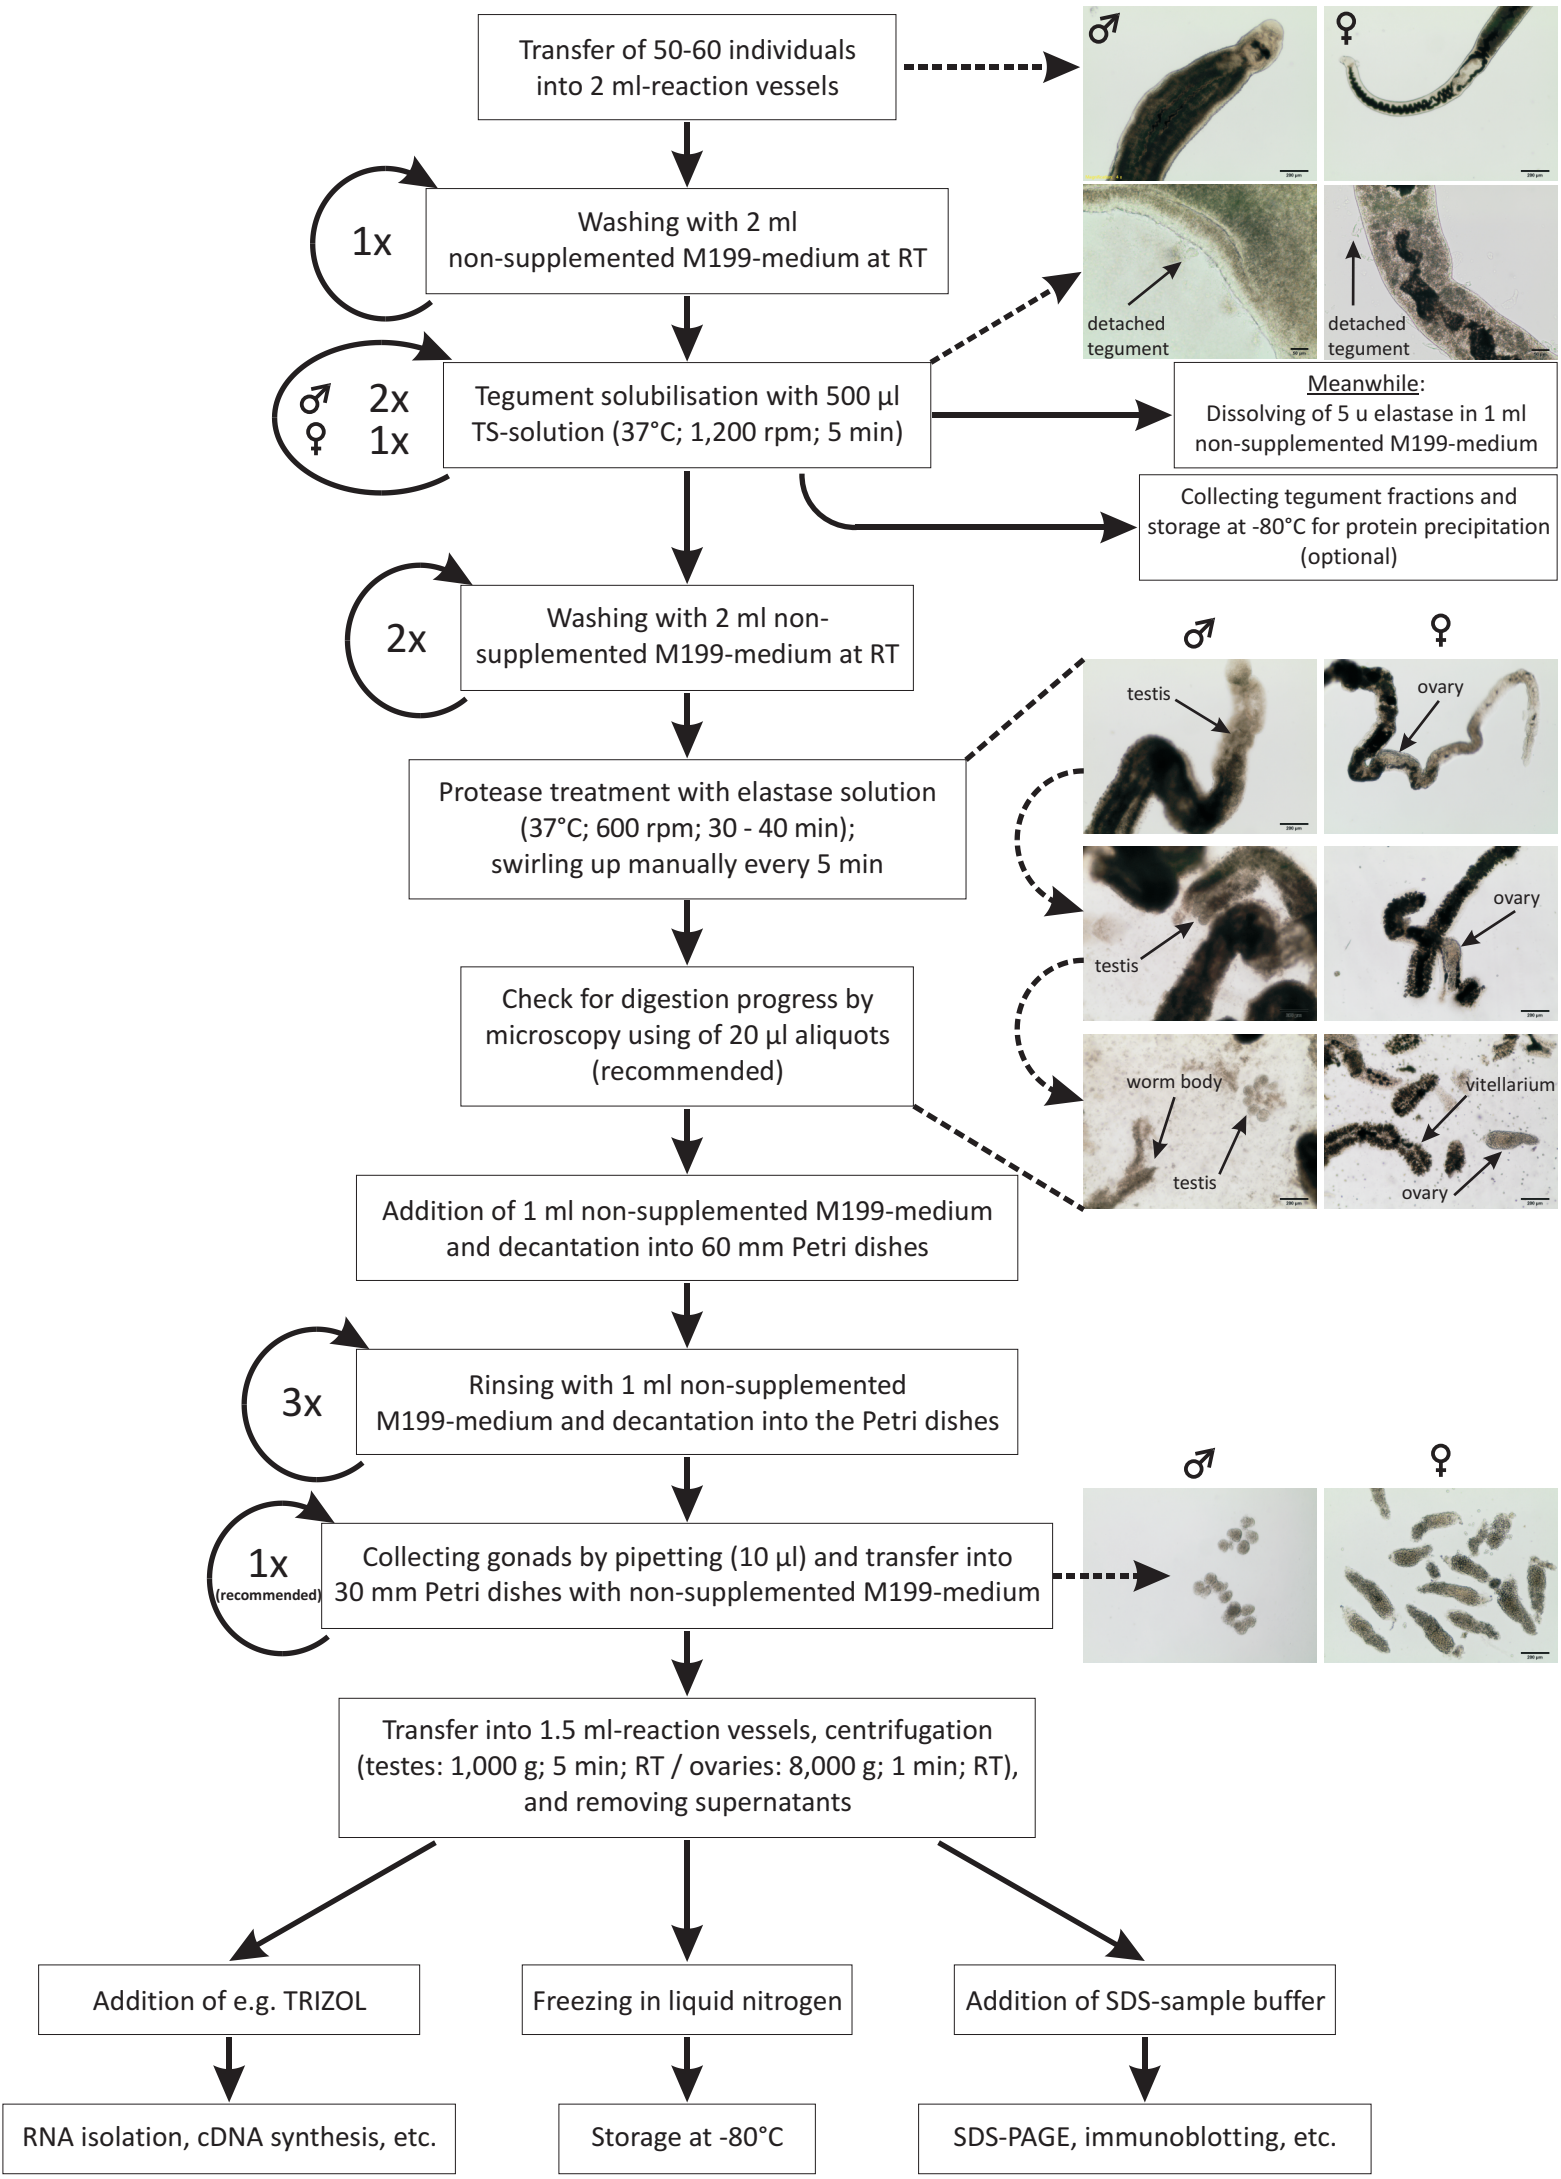

Supplement: S1 (10.1371/journal.pntd.0002336.s001) [file journal.pntd.0002336.s001]
